# Supplementary material
Source: PubMed Central journal article supplement (PMC2667031)
Supplement: 0811660106_0811660106SI.pdf [file 0811660106_0811660106SI.pdf]

# Supporting Information

Love et al. 10.1073/pnas.0811660106

## SI Methods

Transcript profiling details of the thermal cycling conditions were as follows: initial denaturation at 95 °C for 3 min, denaturation at 95 °C for 15 s, primer annealing at 57 °C for 30 s, and extension at 72 °C for 30 s, for total of 45 cycles. The presence of only a single product/reaction was confirmed by analysis of the dissociation curves. The iCycleriQ software version 3.0 (Bio-Rad) was used to calculate the first significant fluorescence signal above noise, the threshold cycle ( $C_T$ ). When necessary, the

threshold level was adjusted manually to cross the exponential portion of the amplification curves for all reactions being compared on the 96-well plate. The PCR efficiencies of each amplicon were determined by using pooled cDNA samples from all samples in 4-fold serial dilutions. The relative transcript levels were calculated as follows:  $100,000 \times E^{C_{TControl}/E^{C_{TTarget}}}$ , in which  $E$  is the amplification efficiency, thus normalizing the target gene expression to the reference gene (generic ribosomal 18S) expression.

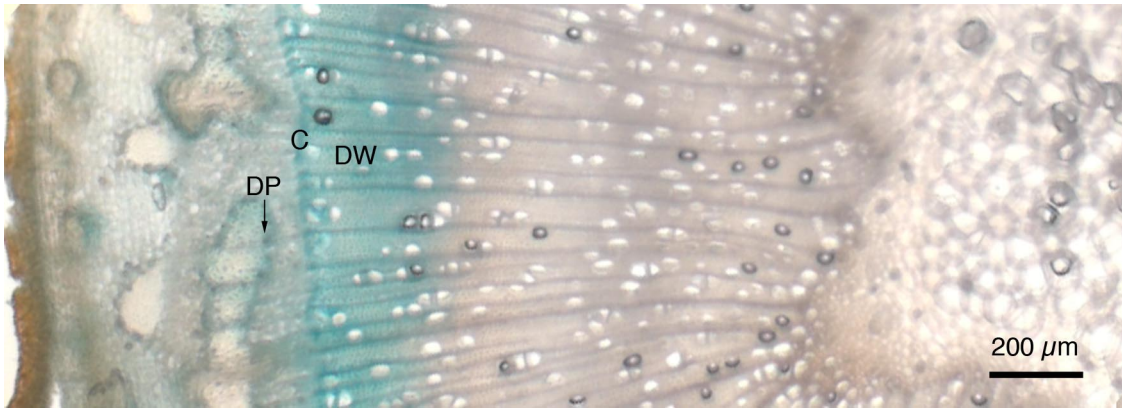

**Fig. S1.** GUS reporter expression patterns of the LMX5 promoter in *Populus* stem tissues. The LMX5 promoter preferentially directs expression to the cambial meristem (C), developing wood cells (DW), and developing phloem fibers (DP). Vascular strands in elongating shoot and root and in petioles and leaves also showed GUS staining, but no GUS staining was observed in the apical meristems. Four independent transgenic trees were analyzed for GUS activity, and all showed a similar expression pattern. A representative expression pattern from internode 25 (counted from top) of a greenhouse-grown tree is illustrated.

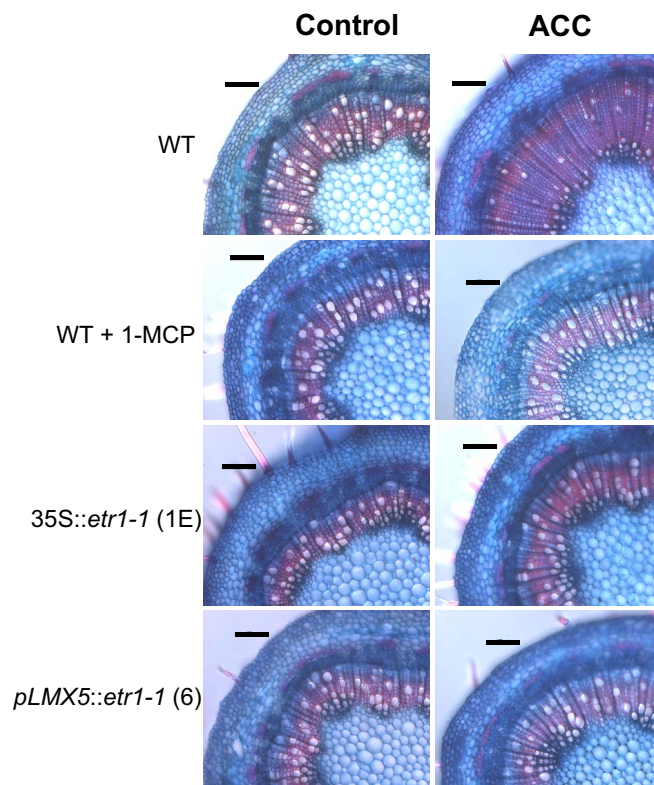

**Fig. S2.** Response in xylem anatomy to water (control) and ACC of wild-type, 1-MCP-treated wild-type, and transgenic 35S::etr1-1 and pLMX5::etr1-1 lines. Xylem anatomy in response to 100  $\mu$ M ACC was used to screen for ethylene insensitivity in primary transgenic lines expressing *etr1-1* under the 35S and LMX5 promoters. The figure shows a typical response in a wild-type tree, a tree treated with 1-MCP (positive control), and from a transgenic line representing each promoter. (Scale bars: 100  $\mu$ m.) Trees were grown in vitro. Treatments were done when the trees had reached a height of 5 cm, and trees were sampled 12 days after the treatment. Sections were sampled from the reference internode, in which all xylem was formed under the influence of ACC.

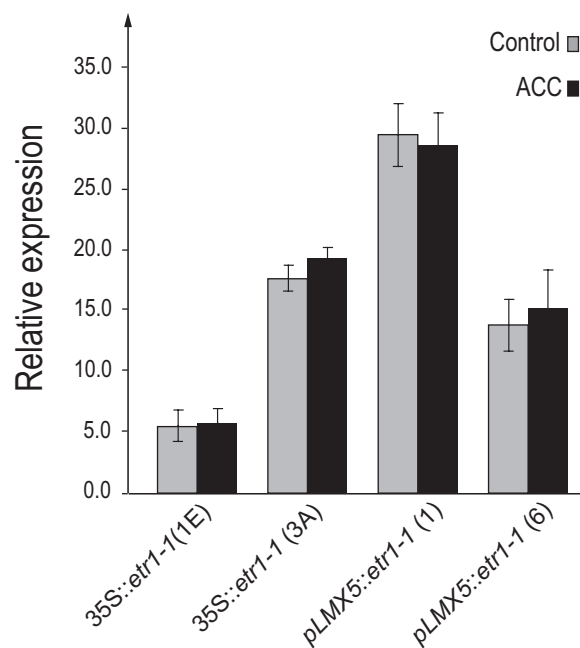

**Fig. S3.** Real-time qPCR analysis of *Atetr1-1* in 35S:*etr1-1* and pLMX5:*etr1-1* transgenic lines after water (control) and ACC treatment. Transgenic trees expressing *Atetr1-1* under the 35S (lines 1E and 3A) or LMX5 (lines 1 and 6) promoters were grown in vitro and treated with either water or 100  $\mu$ M ACC. Treatment was done at a height of 5 cm, and trees were sampled 12 days after treatment. Each sample consisted of pooled internodes from 3 independent trees. Mean  $\pm$  SD of 3 technical replicates is shown. Data are normalized to 18S ribosomal RNA gene. No transcript was amplified from wild-type trees that were included as a negative control.

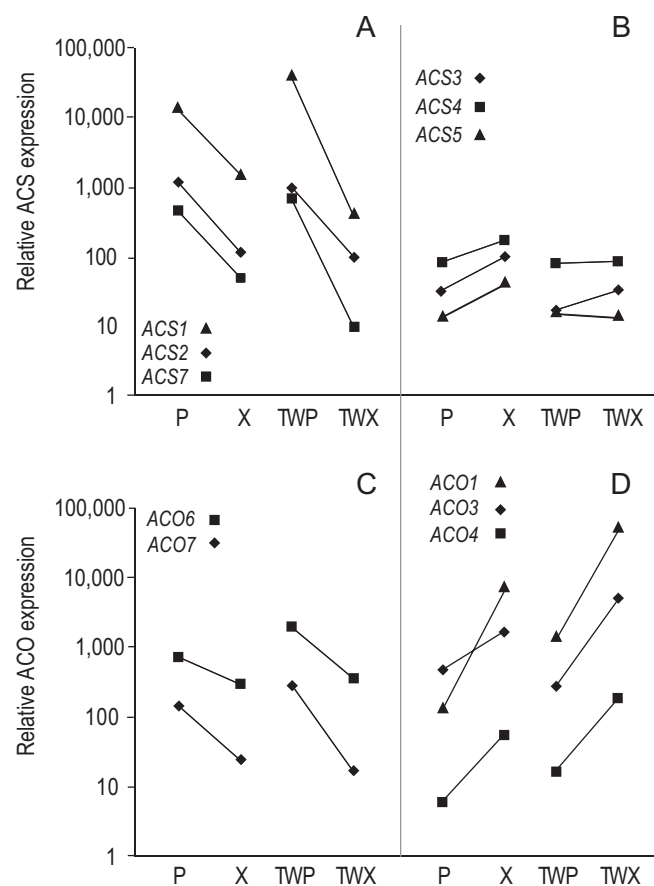

**Fig. S4.** qPCR analysis of *Populus* ACSs and ACOs in upright and leaned trees. (A) The 3 most abundant ACSs were highly expressed in phloem/cambium tissues. (B) Three low-abundant ACSs showed small differences between phloem/cambium and developing xylem tissues. (C) Two ACOs showed higher expression in phloem/cambium tissues than in developing xylem tissues. (D) Three ACOs were preferentially expressed in developing xylem, including the highly abundant ACO1. Trees were grown in greenhouse to a height of 2 m. Transcripts were analyzed with gene-specific primers in pooled tissues of phloem and cambium (P) or developing xylem (X) sampled from 5 upright trees and from 5 TW-forming tissues of trees that had been leaned for 3 weeks. Mean value is calculated from 3 technical replicates (SD not larger than symbol). Data are normalized to 18S ribosomal RNA gene. Gene numbering for ACS/ACO gene family is according to existing *Populus tremula* × *tremuloides* National Center for Biotechnology Information accessions and U.S. Department of Energy Joint Genome Institute *Populus trichocarpa* annotations.

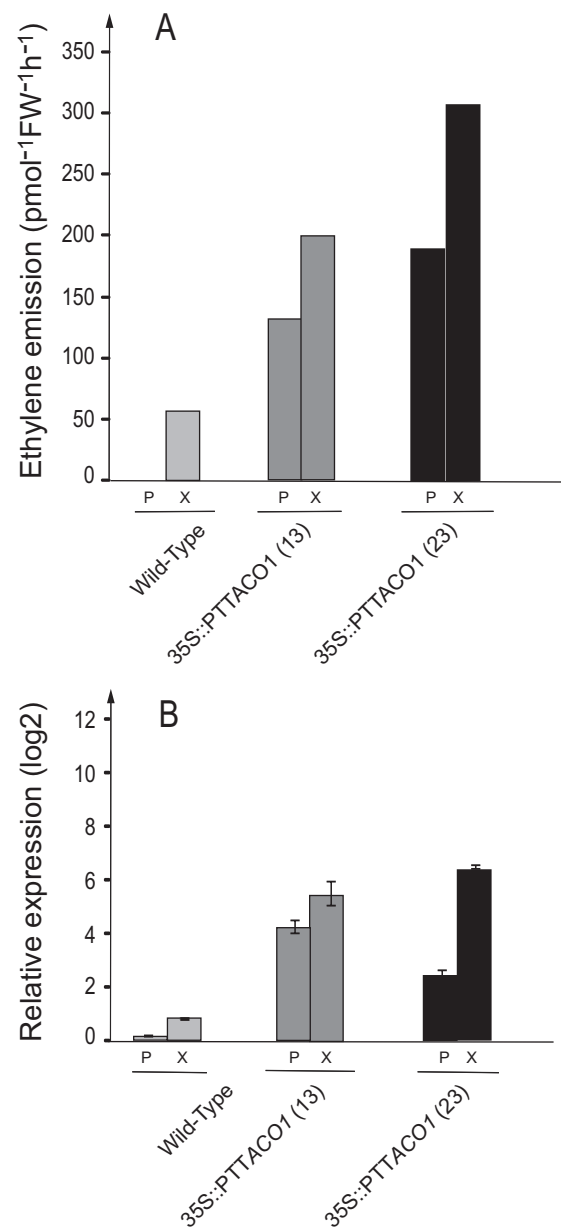

**Fig. S5.** ACO activity (A) and PttACO1 expression (B) in wild-type and transgenic 35S::ACO1 trees. In wild-type trees, expression of PttACO1 and ACO activity is primarily seen in developing xylem. Transgenic 35S::ACO1 trees exhibited an increase in ACO activity and PttACO1 transcript level in both developing xylem and cambium/phloem tissues. Trees were grown in a greenhouse to a height of 2 m. ACO activity was measured in pooled tissues of cambium and phloem (P) or developing xylem (X) scraped from 5 trees. PttACO1 abundance was measured in the same samples by qPCR. Mean  $\pm$  SD of 3 technical replicates is shown. Data are normalized to 18S ribosomal RNA gene.

>LMX5/A055P19U

ACTCGTCTTCGTGCACCAAGATGCAAAAGCTGGAATGAGAATGCGCTAAATGCGAAAAGACAGAGAGAGCGAATAAAT  
CGTGCAAAAAAAGGAGTGGGGTGGGTAACGGGTGAGCTAGAAGAAGAAAAGGGACAAGTGCACCTTTAGGAGGGGGG  
AACCAGAGCGTAGATGATAATGGTTCATGTGGAAACAACACACATGAGCAGTTGGTGAGAACTTGAATGAACCTAAC  
AGCCCAACCAAAACCGGAGCCACCCTTACCGAACCACTTCTAAAAGTACACCATGCCTTTTTCTTGAGCyTGGTT  
GCACAGGGTGCCrGGTGGGGTGTTCGTTTTGGGTAATCATGCGATAGTTTAAATACCTTTGCGATAATCATATCAA  
TGGyGACTTTTAAGCACATGTTAGGTGCTCGGTCTTATCTAAACATGGACATGGCmACAAGAGTTAATGCTAAAATA  
ATATACGTACATACCTGTGAATGAATCGTCGCTGTCTTCTGATTATGGCTTCAAATTAATATGCAGATAAACAAAGTGT  
CGATTTTTTCACTGAAGATTTTATGAAAGTGCCCGTTCTCCTTAAGATTACCTGTGAATGAATCATCCCTGTCAGGCTG  
ATCCTGGGTGNTTTTTCCCATGrTGTTCGGAAGATATAATTATATAAATGATGGAATTTACATGAAATAAGTTTCAG  
TACATTTCTAGCAGAAAAGCAATATCGACGAAGACAAATGATGCTGTTTAAAGACAAACTGGGGTAATATCAATTTACT  
AGTAAGAGATTTGkCTGCTTTTTCTTAATTCTCAAGAACTTyCACTAAAATGCACAGCCATGTTAAACAATTTACGTT  
CAACTTAAAACTAAAATGCAGGATGGGTAGCTATCCAAGAATGATTAATAAACGATTTTAAACAAGAACTACGTTT  
TTTGTAACCTTAATTTTGATGGGCATGTAGTTAAACAAGTATTTGTCTTGTGATCAATTCAAGAGCCATGTCTGCATCAT  
AATTGTGGGAGTGGAGGAGGCTTTTGTGCTAGGGAAGGAATGCCTTCTTAGTTCATGGCTTTGGACTTCGGACAAGG  
AGCGCATAGAATGGGGTTACCATTTTTGAAAAAATTACATTTGAACCTCCAACCTATTATCATGTATGTTAATCTA  
CAATCCTCGTCCGCTAGAAGAAGTTTGGGTCAAAGTCATCCGCTCAATGTAAACCATGGAGAGGCAGGGACTAATTG  
AAAATAGTATGTTAGTTGGAGGGTCTGCATGTATTATGTCCAAACATTCTCTTATTATTCTGTATCATCTCTGAGAA  
ATTCATCCGAAAATAATAAAACAAATGGCCTTTTTTAAAAAAGAAGCTGATGCATAGGATACCAAAGCGCCTTGT  
CCATTAGGAGCGTCAGACTTTGAAATAAGACCAATAATTCCTGTAAGCTATCATCTCATCTTTTATTTTGTGTTGAA  
CTTGTTAGACGTAGGCTTTAAGCGTTCCATGATGTTGAGTCACATGTTGCTGTCTACTTGATTATGGAATTTAATTCAT  
TCGGCTCATAAGAAGATAAAAGGATTATGACGTTGAAGAACTCTGGTCACTCCTTACTTACGGTCACATAAAAACGAT  
GCATCTTTCCCAACCAACCATCTTCAAGTGAACCCACTTTCCCTTGCAATAGGTAAGGAGTATGGGTAAAGTCATCTT  
CATGAAATTAGTCCCTAGTGGAGCTAATTTCTACTCACTCCATATTTACTCATTCCACTATATAACGCCCTCAACGAC  
CATCCTCAAAGCAACCCAAACACCTTCTTCTCTTCTCTTTCTCCCGGAAAATGGCCGGTTTGATTTCAAGATCA  
GTTCCCTGTGCAATCCTGGTAGTCTTGTGCACGGTGGTGCCATTTTGGCTAAAGATTACACTGTAGGAGATACTTCA  
GGCTGGGCAATTGGTATGGATTATAGCACCTGGACTAGTGGCAAGACCTTTTCAGTTGGCGACAGCCTTGGTGAGTCC  
CTTTCTCTCAGTACAGTTACTGATCAAGATTAGTACTTGATTTACTAATCAGGTTTCTGTTTAAATATATAATCTAG  
TGTTTAACTACGGAGGAGGCCACACGGTGGATGAAGTGAGAGCCAGTGACTACAGCACATGCACTACAGGCAATGCAA  
TCACTTCAGATAGCAGTGGTGCTACCACAGTAGCCCTCAAGACTGCCGAACCCATTATTTTATTGTGGTGTTCCTG  
GCCACTGTGGGAGTGGCATGAAGGTTTCAGTCACTGTTGCAGCAGCAGGATCGAGCACAAGTCCCTCCTCCTCAGGAA  
CTCCATCTTCTGATGGCACTACCATTCTCCGGCCGGTAGTAATGTCACCAATTACAAGCCTTCATCCAACAACGTAC  
CCGATTATCCTTAGGGATCAATATTTCCCATTTGTGGCTTTAGCCGGTACTTGTGTTGCCGTTTTTGTGATGGGTT  
TCTCATGA

**Fig. S6.** The gene sequence of LMX5 promoter region obtained with GenomeWalker Universal Kit upstream of the EST clone A055P19. Promoter region is underlined, and the primer sites for promoter cloning and vector constructions are double-underlined. y, T or C; r, A or G. The 5' UTR and predicted protein coding sequence are highlighted with gray. The predicted translational start codon is marked with bold font.

**Table S1. *Populus* trees treated with 1-MCP or expressing *Atetr1-1* have reduced sensitivity to ACC-induced inhibition of diameter growth of fibers and vessel elements**

| Trees (line) and treatment                      | Fiber diameter, $\mu\text{m}$ | Vessel element diameter, $\mu\text{m}$ |
|-------------------------------------------------|-------------------------------|----------------------------------------|
| WT plus H <sub>2</sub> O                        | 18.4 $\pm$ 0.4                | 33.3 $\pm$ 0.9                         |
| WT plus ACC                                     | 17.2 $\pm$ 0.3*               | 27.8 $\pm$ 0.7***                      |
| WT plus H <sub>2</sub> O plus 1-MCP             | 17.5 $\pm$ 0.4                | 34.9 $\pm$ 0.8                         |
| WT plus ACC plus 1-MCP                          | 17.6 $\pm$ 0.4                | 35.3 $\pm$ 1.0                         |
| 35S:: <i>etr1-1</i> (1E) plus H <sub>2</sub> O  | 14.7 $\pm$ 0.6                | 32.6 $\pm$ 1.3                         |
| 35S:: <i>etr1-1</i> (1E) plus ACC               | 14.6 $\pm$ 0.5                | 29.9 $\pm$ 0.9                         |
| 35S:: <i>etr1-1</i> (3A) plus H <sub>2</sub> O  | 14.7 $\pm$ 0.4                | 32.4 $\pm$ 0.9                         |
| 35S:: <i>etr1-1</i> (3A) plus ACC               | 15.7 $\pm$ 0.8                | 32.4 $\pm$ 1.2                         |
| pLMX5:: <i>etr1-1</i> (1) plus H <sub>2</sub> O | 14.6 $\pm$ 0.4                | 31.1 $\pm$ 1.4                         |
| pLMX5:: <i>etr1-1</i> (1) plus ACC              | 14.0 $\pm$ 0.5                | 32.8 $\pm$ 2.0                         |
| pLMX5:: <i>etr1-1</i> (6) plus H <sub>2</sub> O | 14.8 $\pm$ 0.5                | 34.9 $\pm$ 0.9                         |
| pLMX5:: <i>etr1-1</i> (6) plus ACC              | 15.9 $\pm$ 0.2                | 34.6 $\pm$ 0.2                         |

Wild-type control trees, transgenic trees expressing *Atetr1-1* under control of the 35S (lines 1E and 3A) or LMX5 (lines 1 and 6) promoters, and wild-type trees treated with 1-MCP were grown in vitro and treated with either water or 100  $\mu\text{M}$  ACC. The inhibition of ACC on fiber and vessel element diameter growth was nullified in transgenic and 1-MCP-treated trees, demonstrating their ethylene insensitivity for these processes. Treatments were done when the trees had reached a height of 5 cm, and trees were sampled 12 days after the treatment. Xylem cell width was measured in macerated xylem from the reference internode, in which all xylem was formed under the influence of ACC. For each tree, 20 vessel elements and 30 fibers were measured, and a mean value for each tree was calculated. This mean value from each individual tree was used to calculate a mean  $\pm$  SE of between 8 and 15 independent trees. Statistically significant differences (Student's *t* test) between water- and ACC-treated trees within genotype (or within 1-MCP-treated trees) are indicated by \*,  $P < 0.05$ ; \*\*\*,  $P < 0.001$ .

**Table S2. Primer sequences used in cloning procedures**

| Gene/target              | Primer                                                                                       | Product size, bp |
|--------------------------|----------------------------------------------------------------------------------------------|------------------|
| <i>LMX5</i> promoter     | 5'-GATGCAAAAGCTGGAATGAG (plus a 5' BglII site)<br>5'-GAGAAGAAGGTGTTTGG (plus a 5' SalI site) | 1,807            |
| Cassette reading frame B | 5'-AAGGTGATCAATCAACAAGTTTG (5' BclI)<br>5'-CCGAGCTCATCAACCACTTT (5' SacI)                    | 1,731            |
| Genomic <i>etr1-1</i>    | 5'-attB1-GTTAAACCAACCAATTTGAC<br>5'-attB2-TGTTGTTGTTCTACTAAGCGGC                             | 3,595            |

For every primer pair, the upper one is the forward primer and the lower one the reverse primer. The added restriction sites are underlined.

**Table S3. Primer sequences used in all real-time qPCR analyses**

| Gene              | Real-time qPCR primer                                    | Product size, bp |
|-------------------|----------------------------------------------------------|------------------|
| Ribosomal 18S RNA | 5'-TCAACTTTCGATGGTAGGATAGTG<br>5'-CCGTGTCAGGATTGGGTAATTT | 145              |
| <i>etr1-1</i>     | 5'-AGCCATTCCCCGACATTCAA<br>5'-GGTGTACAAGAAGTCCCTTCGTCA   | 98               |
| <i>ACS1</i>       | 5'-TGGAAGCCTATGACACTGAT<br>5'-GGAGGCTTTGGATTCTTCTT       | 132              |
| <i>ACS2</i>       | 5'-GATGGATGGAAAGCTTACGAT<br>5'-ATGGAGGCTTTGGGATGTT       | 140              |
| <i>ACS3</i>       | 5'-GAGTCATGGCTGGCTAAGAA<br>5'-TTCTGCCATGAATTCTACCAA      | 138              |
| <i>ACS4</i>       | 5'-TGGCTTGCTAATAACCAGGA<br>5'-AGCCATGAATTCCACCAA         | 129              |
| <i>ACS5</i>       | 5'-GCTGGAAGGCACACGAT<br>5'-GCTTCTGAATTCTGTTCCAAGTA       | 130              |
| <i>ACS6</i>       | 5'-TCATCTAATCCATCAGGAGTCAT<br>5'-CTAAACCTGGCGATCCTTT     | 128              |
| <i>ACS7</i>       | 5'-GCTGGAAGCCTATGACAGTA<br>5'-GGAGGCTTTGGGTTGTT          | 134              |
| <i>ACS8</i>       | 5'-GAATCCATATCACGATGTGCAT<br>5'-CACCATTCTTCTTCAACCCAA    | 134              |
| <i>ACO1</i>       | 5'-GATAACGAGTGGCCATCAA<br>5'-CCTTCTCCATCATTGAATGCTT      | 158              |
| <i>ACO2</i>       | 5'-TTGCGACATCTCCCAT<br>5'-GACTACCGCTAGATCCACAGAA         | 147              |
| <i>ACO3</i>       | 5'-CGCCATCTCCCTAAGTCAA<br>5'-GGACTACCGTTTGATCCATAGAA     | 185              |
| <i>ACO4</i>       | 5'-TTGTCATCAATACCGGTGAT<br>5'-TGCTGGTGCAGGAGCTA          | 155              |
| <i>ACO5</i>       | 5'-CCAACATCCAACATCAATGAA<br>5'-ATGTAATCCTTGTCAGTCCAA     | 143              |
| <i>ACO6</i>       | 5'-CAACCATGGAGGTGATCAA<br>5'-TGCTAGCCACCATCTCCTT         | 152              |
| <i>ACO7</i>       | 5'-CCAACCATGGAGAAGATTGAA<br>5'-CCACCATTCTTGAACCTT        | 154              |

For the every primer pair, the upper one is forward primer and the lower one is the reverse primer. Gene numbering for ACS/ACO gene family is according to existing *Populus tremula* × *tremuloides* National Center for Biotechnology Information accessions and U.S. Department of Energy Joint Genome Institute *Populus trichocarpa* annotations. The genome mining for the *P. trichocarpa* ACS/ACO gene family was conducted by a BLAST search using *Arabidopsis*, rice, and tomato ACS/ACO genes and their domain variants as an electronic probe.
